# Supplementary material for: Mesoporous carbon nanospheres deposited onto D-shaped fibers for femtosecond pulse generation
Source: Royal Society of Chemistry journal article supplement (doi:10.1039/c9ra01082c), 2019-01-01
Supplement: c9ra01082c1.pdf [file c9ra01082c1.pdf]

**-SUPPORTING INFORMATION-**

**Mesoporous Carbon Nanospheres Deposited onto D-shaped Fibers for  
Femtosecond Pulses Generation**

Fang Wang,<sup>a</sup> Hua Zhou,<sup>a</sup> Nan Li,<sup>a</sup> Jiaying Liu,<sup>a</sup> Daguang Li,<sup>a</sup> Zhe Kang,<sup>a, b</sup> Zhixu Jia,<sup>a</sup> Zhen-an Qiao,<sup>a</sup>  
Weiping Qin,<sup>a</sup> Guanshi Qin\*<sup>a</sup>

<sup>a</sup> State Key Laboratory on Integrated Optoelectronics, College of Electronic Science and Engineering;

State Key Laboratory of Inorganic Synthesis and Preparation Chemistry, College of Chemistry, Jilin

University, Changchun 130012, China

<sup>b</sup> Changchun Observatory, National Astronomical Observatories, CAS, Changchun 130117, China.

## Supplementary Figures

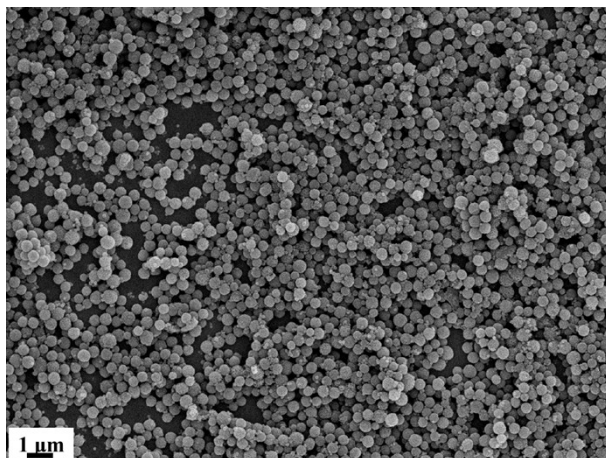

**Figure S1.** Typical scanning electron microscopy (SEM) image of mesoporous carbon nanospheres (MCNs)

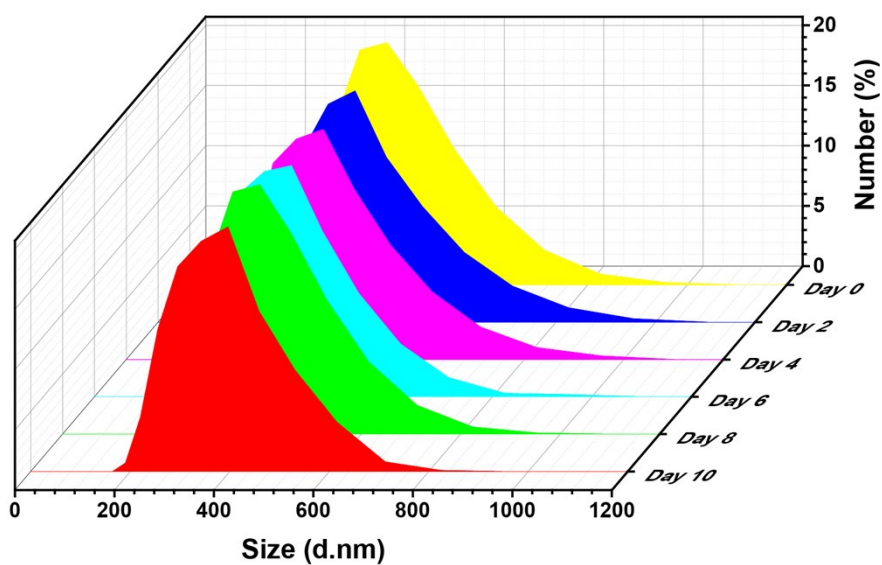

**Figure S2.** Hydrodynamic diameter of the MCNs in aqueous suspension over 10 days

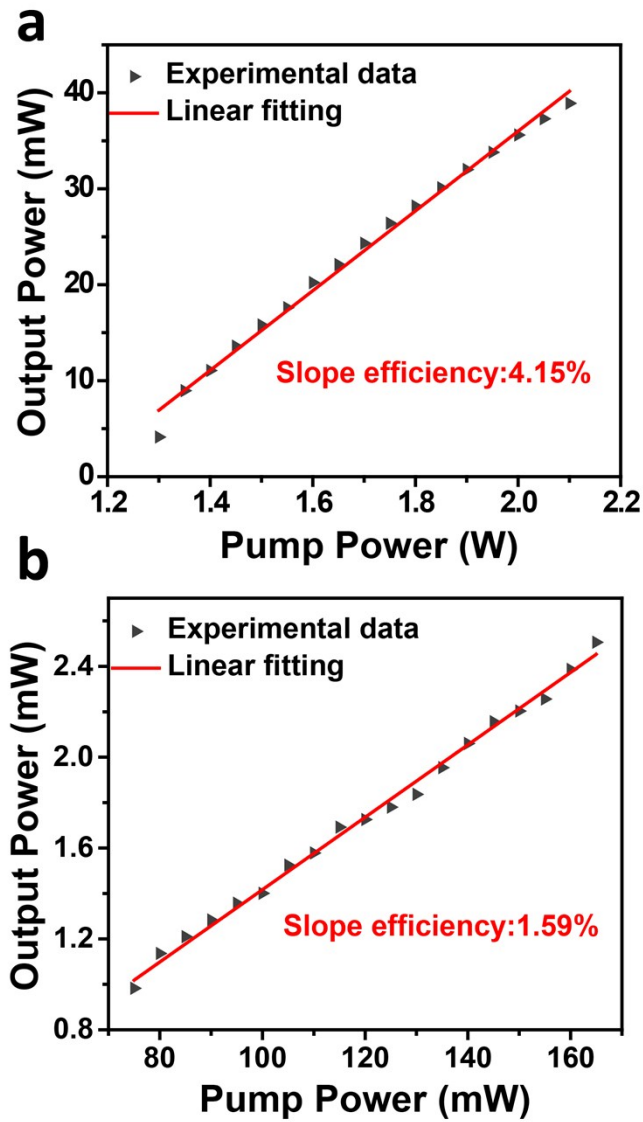

**Figure S3.** (a) Output power of the mode-locked Tm<sup>3+</sup>-doped fiber laser as a function of the pump power. (b) Output power of the mode-locked Er<sup>3+</sup>-doped fiber laser as a function of the pump power.

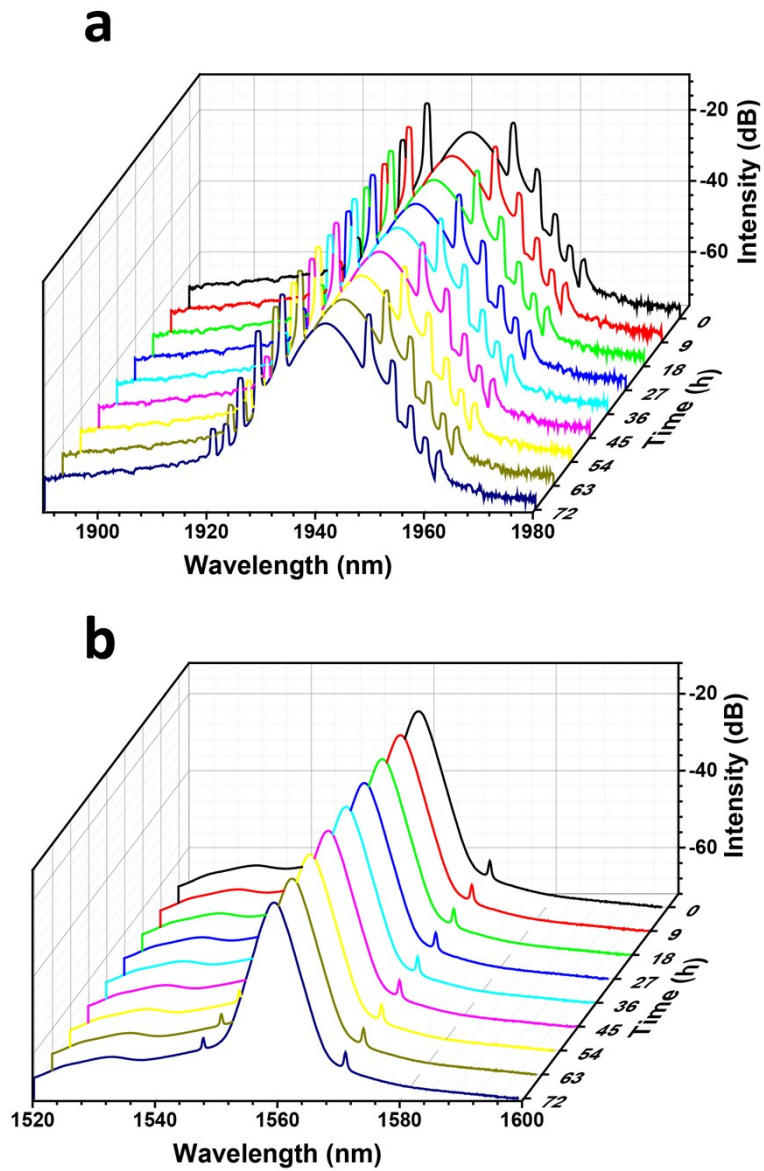

**Figure S4.** Time-dependent emission spectra of the mode-locked lasers at (a) 2 and (b) 1.56  $\mu\text{m}$  measured at 9 h interval, respectively.

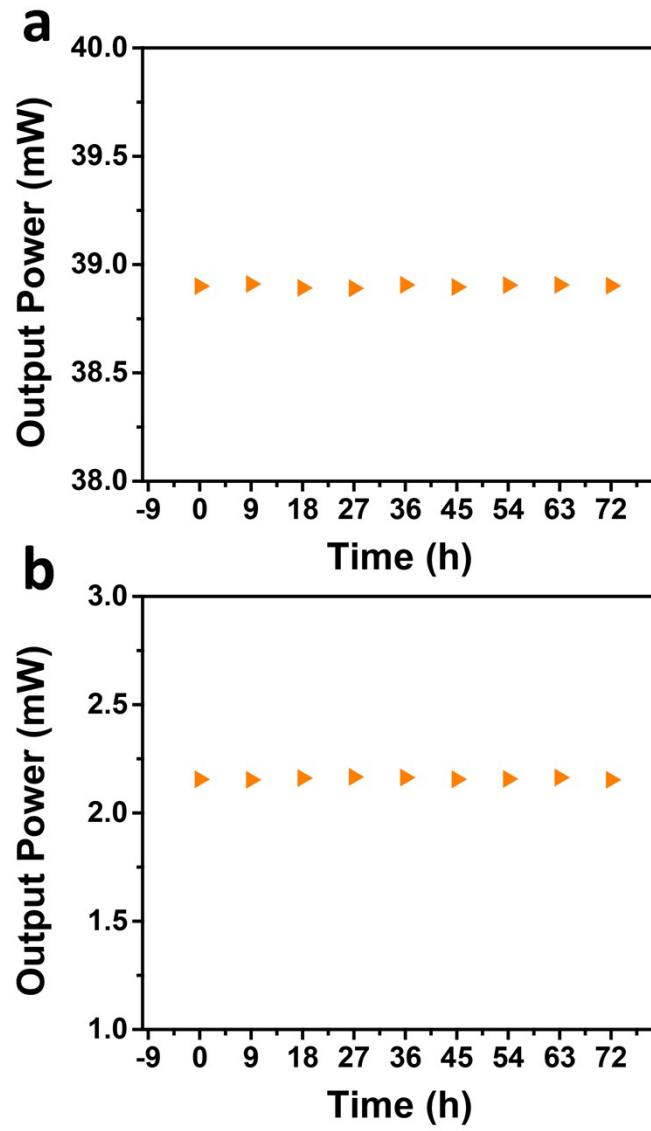

**Figure S5.** Output power of the mode-locked lasers at 2 and 1.56  $\mu\text{m}$  for the pump power of 2.1 W and 150 mW at 9 h interval, respectively.

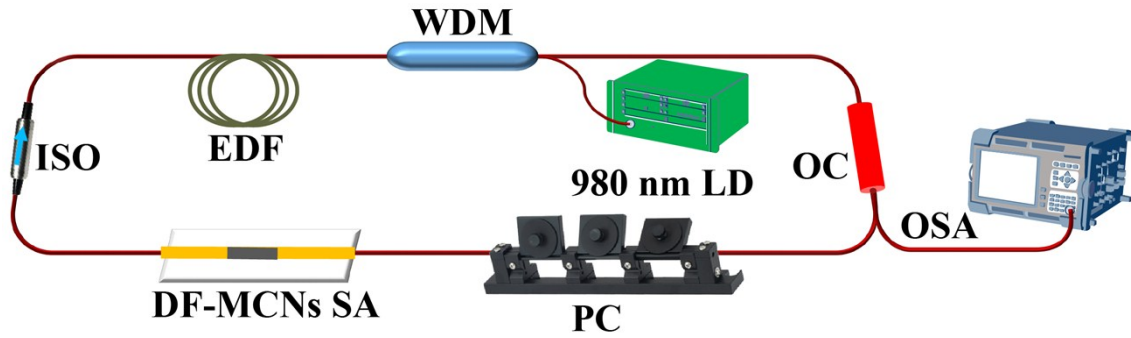

**Figure S6.** Experimental setup of the Er<sup>3+</sup>-doped fiber laser ring cavity.

The pump light was a 980nm laser diode (LD), which would be launched into the cavity through a 980/1550 nm wavelength-division multiplexing (WDM) coupler. A 20cm-long Er<sup>3+</sup>-doped fiber (EDF) was utilized as the gain medium. An isolator (ISO) was added to avoid any harmful feedbacks. A polarization controller (PC) was put in the cavity for the optimum polarization state. The 10 dB optical coupler (OC) was adopted to output 10% of the laser and the rest continued propagating in the cavity. The DF-MCNs SA was integrated into the fiber cavity. The output end of the 10 dB OC was connected to an optical spectrum analyzer (OSA) to present the laser spectrum.
